# Supplementary material for: Multivariate analysis of electrophysiological diversity of Xenopus visual neurons during development and plasticity
Source: eLife. 2015 Nov 14;4:e11351. doi: 10.7554/eLife.11351 (PMC4728129; doi:10.7554/eLife.11351)
Supplement: Supplementary file 2. — This spreadsheet contains the extracted parameters from every cell in this study. These data was used for generating principal component analysis and other statistical measures. DOI: http://dx.doi.org/10.7554/eLife.11351.012 [file elife-11351-supp2.xlsx]

## Sheet: data
		Variable number:	1	2	3	4	5	6	7	8	9	10	11	12	13	14	15	16	17	18	19	20	21	22	23	24	25	26	27	28	29	30	31	32	33
id	stage	stimulated	Cm pF	Rm GΩ	Ra MΩ	I_hold pA	I_Na activ mV	I_Na max pA	I_K stable activ mV	I_K stable max pA	I_K trans activ mV	I_K trans max pA	Tail ms	Spike thresh mV	Spike amp mV	Spike risetime ms	Spike width ms	Spiking I_best pA	Spiking N spikes	Spiking ISI ms	Spiking ISI accomm.	Spiking amplitude accomm.	Cosine N_spikes	Cosine resonance ms	Cosine resonance width, ms	wave buildup #wave	wave decay #wave	Jitter	synaptic resonance ms	synaptic resonance width	synaptic charge pA*s	synaptic PPF	Mono-synapticity	minis freq Hz	minis amp pA	daytime (days)	age of the prep (h)	locx	locy
1002	48	0	12.4	0.72	36.5	47	-27.3	267.7	-28	377.4	7.7	216.7	NaN	NaN	NaN	NaN	NaN	NaN	NaN	NaN	NaN	NaN	NaN	NaN	NaN	NaN	NaN	NaN	NaN	NaN	NaN	NaN	NaN	NaN	NaN	0.510417	0.466667	NaN	NaN
1003	48	0	7.5	1.2	83	43	-19.6	88.9	-29.8	234.1	6.7	44.8	39.4974	NaN	NaN	NaN	NaN	NaN	NaN	NaN	NaN	NaN	NaN	NaN	NaN	NaN	NaN	NaN	NaN	NaN	NaN	NaN	NaN	NaN	NaN	0.510417	0.75	NaN	NaN
1004	48	0	16	0.592	57	46	-6.1	180.9	-19.4	313.3	-19.2	145.2	17.8143	-41.831	19.523	1.2	3.3	86.8	1.0005	NaN	NaN	NaN	NaN	NaN	NaN	NaN	NaN	NaN	NaN	NaN	NaN	NaN	NaN	NaN	NaN	0.510417	1.1	NaN	NaN
1005	48	0	11.3	1.5	70	14	-18.1	296.2	-29.8	295.9	-20.2	141.8	36.836	-24	5	1	2	100	1	NaN	NaN	NaN	NaN	NaN	NaN	NaN	NaN	NaN	35.163	103.266	9698.51	2.19	1.93615	NaN	NaN	0.510417	1.45	NaN	NaN
1006	48	0	14	1.2	55	15	-5.9	243	-25	434.9	2.2	47.9	NaN	NaN	NaN	NaN	NaN	NaN	NaN	NaN	NaN	NaN	NaN	NaN	NaN	NaN	NaN	NaN	NaN	NaN	NaN	NaN	NaN	NaN	NaN	0.510417	1.98333	NaN	NaN
2001	48	0	19	1.3	29.4	9.8	-18.6	281.9	-19.9	396.3	-22.4	124.1	31.279	-29.04	8.353	1.3	3.6	60	2.292	13.7	NaN	1.32	NaN	NaN	NaN	NaN	NaN	NaN	NaN	NaN	NaN	NaN	NaN	NaN	NaN	0.440972	0.433333	NaN	NaN
2002	48	0	14.3	2.1	38.8	3.5	-17.6	226.7	-16.3	260.7	-22.9	63.4	32.6271	-28.56	12.36	1.3	2.8	180.031	3.5836	11.5	1.017	3.412	NaN	NaN	NaN	NaN	NaN	NaN	NaN	NaN	NaN	NaN	NaN	NaN	NaN	0.440972	1.01667	NaN	NaN
2003	48	0	10	2	24	13	-16.6	252.7	-11.1	580.1	9.7	172	NaN	NaN	NaN	NaN	NaN	NaN	NaN	NaN	NaN	NaN	NaN	NaN	NaN	NaN	NaN	NaN	NaN	NaN	NaN	NaN	NaN	NaN	NaN	0.440972	1.33333	NaN	NaN
2004	48	0	14.2	0.935	31.4	26.1	NaN	NaN	NaN	NaN	NaN	NaN	42.5068	-29.354	23.834	0.8	2.3	144	2.8246	12.2	1.77	2.504	NaN	NaN	NaN	NaN	NaN	NaN	NaN	NaN	NaN	NaN	NaN	NaN	NaN	0.440972	3.68333	NaN	NaN
3001	46	0	19	1.3	45.4	3	-23.2	350.4	-27.6	438.5	11.5	87.5	24.0806	-31.307	14.339	1.5	6.6	148.2	1.5969	12.7	NaN	3.747	NaN	NaN	NaN	NaN	NaN	NaN	NaN	NaN	NaN	NaN	NaN	NaN	NaN	0.53125	0.383333	NaN	NaN
3002	46	0	17.4	1.1	37	13	-28.7	221.1	-30.5	280.8	-2.8	46.5	25.7712	-48.523	20.203	1.1	3.1	136.4	3.0563	13	1	3.998	NaN	NaN	NaN	NaN	NaN	NaN	NaN	NaN	NaN	NaN	NaN	NaN	NaN	0.53125	0.866667	NaN	NaN
3003	46	0	17	1.5	83	2.4	-18	418.6	-20.5	401.7	-9.6	154.4	38.2949	-33.604	18.703	1.1	2.2	73.8	5.1212	15.9	1.101	1.58	NaN	NaN	NaN	NaN	NaN	NaN	20.22	9.559	24768	1.236	1.77521	NaN	NaN	0.53125	1.25	NaN	NaN
3004	46	0	19	1	47.6	18	-16.5	394.9	-18.7	680.9	-11.6	254.1	30.9613	-29.075	21.21	1.1	2.2	180.038	5.5431	10.1	1.069	1.463	NaN	NaN	NaN	NaN	NaN	NaN	81.642	78.765	7845.49	4.453	1.26031	NaN	NaN	0.53125	2.25	NaN	NaN
3005	46	0	19.7	1.2	57	7	-27.4	585.5	-19.4	665.5	-0.1	146.5	47.9513	-26.297	38.749	1.1	2.6	180.029	8.1617	8.4	1.298	2.112	NaN	NaN	NaN	NaN	NaN	NaN	NaN	NaN	NaN	NaN	NaN	NaN	NaN	0.53125	3.05	NaN	NaN
4001	48	0	19	1.7	62	6	-7.5	317.2	-15.3	365.3	-16.7	243.5	51.7752	-30.204	12.512	1.4	4.6	180.072	5.398	29.9	0.552	1.146	NaN	NaN	NaN	NaN	NaN	NaN	NaN	NaN	NaN	NaN	NaN	NaN	NaN	0.494444	0.133333	NaN	NaN
4002	48	0	20	1.2	60.9	7.5	-16.2	354.5	-17.3	466.7	-24	83.5	23.2094	-25.347	14.404	1.4	4.1	103	2.6022	13.9	1.237	2.156	NaN	NaN	NaN	NaN	NaN	NaN	NaN	NaN	NaN	NaN	NaN	NaN	NaN	0.494444	1.36667	NaN	NaN
4003	48	0	14	1.6	69	4.1	-17.4	188.2	-10	243.8	-19.4	141.4	42.2689	-32.131	15.895	1.7	3.3	180.081	5.4177	15.4	0.903	1.497	NaN	NaN	NaN	NaN	NaN	NaN	NaN	NaN	NaN	NaN	NaN	NaN	NaN	0.494444	1.9	NaN	NaN
4004	48	0	17.9	0.9	65.9	63	-17.8	274.5	-19	415	-16.9	108.4	NaN	NaN	NaN	NaN	NaN	NaN	NaN	NaN	NaN	NaN	NaN	NaN	NaN	NaN	NaN	NaN	NaN	NaN	NaN	NaN	NaN	NaN	NaN	0.494444	2.21667	NaN	NaN
5001	49	0	13	NaN	NaN	NaN	-27.4	314.4	-28.9	432.4	9.9	39.9	19.8739	-40.27	14.954	1	3.4	59.9	4.4817	13.3	1.135	1.709	NaN	NaN	NaN	NaN	NaN	NaN	NaN	NaN	NaN	NaN	NaN	NaN	NaN	0.579861	0.25	NaN	NaN
5002	49	0	11.5	0.95	170	8	-36.6	360.8	-37.1	248.5	3.2	270.2	38.2633	-31.071	17.029	0.9	2.2	102.7	4.5483	8.6	1.186	3.109	1.017	50.0033	130.9	5	150	0.0307705	10.0092	87.527	9272.25	9.171	3.43177	NaN	NaN	0.579861	0.45	NaN	NaN
5003	49	0	19.3	0.685	103	12	-17.8	448.6	-22.1	436.7	-21.6	149.9	38.1118	-18.119	16.985	0.8	1.4	180.094	7.7699	11.1	0.892	1.377	1.027	50.0094	136.64	20	35	0.121363	10.009	144.459	18378.8	1.408	0.348849	2.55932	3.23288	0.579861	1.36667	NaN	NaN
6001	47	0	19.9	1.1	72.9	NaN	-22.9	612.8	-28	711.9	-13.9	184	NaN	NaN	NaN	NaN	NaN	NaN	NaN	NaN	NaN	NaN	NaN	NaN	NaN	NaN	NaN	NaN	NaN	NaN	NaN	NaN	NaN	NaN	NaN	0.4875	0.3	NaN	NaN
6002	47	0	17.5	1.8	37.5	6	-10.2	549	-8.9	836.7	-12.1	120.8	27.6021	-16.78	22.021	1.6	2.3	180.012	11.4145	11	1.073	0.987	0.738333	20	2.66	8	3.8	0.113679	10.0053	113.339	12723.4	1.549	1.52934	7.89655	2.80169	0.4875	0.55	NaN	NaN
6003	47	0	19	1.2	44	2	-15.4	631.4	-19.9	513.4	-15.1	395.7	68.9891	-25.896	38.156	1	1.9	180.009	10.219	27.6	0.551	1.036	0.961667	50.0024	131.27	20	13	0.142547	NaN	NaN	NaN	NaN	NaN	NaN	NaN	0.4875	1.93333	NaN	NaN
7001	49	0	17	1.1	74	25	-16	607.3	-25.6	1010.5	3.1	248	18.9962	-34.127	12.338	0.8	1.6	180.055	7.1283	8.8	0.966	1.743	1.201	50.0043	136.68	7	150	0.0663609	NaN	NaN	NaN	NaN	NaN	21.9245	10.203	0.569444	0.25	NaN	NaN
7002	49	0	19.5	1.4	97	2.5	-26.5	321.2	-26.6	321	12.6	67.4	29.5798	-39.311	34.969	1.3	2.6	180.097	4.8293	8.8	1.227	1.877	0.897	34	8.91	3	5.9	0.0623317	NaN	NaN	NaN	NaN	NaN	NaN	NaN	0.569444	0.783333	NaN	NaN
7003	49	0	14.8	1.5	42	20	-24.6	235.8	-17.1	572.6	-1.2	352.4	29.3526	-36.839	14.975	1	4.4	104.7	7.1332	14.9	1.013	1.35	0.815	35	9.23	12	5.3	0.0994144	NaN	NaN	NaN	NaN	NaN	NaN	NaN	0.569444	1.16667	NaN	NaN
8001	49	0	18.8	0.409	27.3	78	-27.6	784.3	-22	1078.8	-0.8	210	19.482	-37.48	22.98	0.9	2	180.056	5.3395	9.6	1.406	2.329	0.759	30	6.16	19	2.6	0.0782615	46.847	106.498	12483.7	3.817	0.13353	3.03333	6.45634	0.472222	0.216667	NaN	NaN
9001	48	0	19.65	1.9	45	25	-12.7	210	-8.2	308.1	-17.1	414	46.9214	-36.32	30.709	1.4	2.9	180.063	6.4781	15.7	0.955	1.136	0.775667	31	6.67	17	2.2	0.082442	NaN	NaN	NaN	NaN	NaN	NaN	NaN	0.548611	0.25	NaN	NaN
9002	48	0	10.9	2.9	27	2	-18.5	175.3	-7.5	234.7	17.4	87.8	66.122	-15.629	14.417	2.1	7.2	180.014	5.0033	9.3	0.989	3.706	0.227333	10	16.15	3	8.1	0.178421	NaN	NaN	NaN	NaN	NaN	NaN	NaN	0.548611	0.583333	NaN	NaN
9003	48	0	14.9	1.1	74	9	-17.4	337	-16.1	354.7	-19.7	167.4	49.7468	-18.834	27.204	0.9	1.7	159.8	11.2029	10.2	1.059	1.241	1.205	50.0028	132.53	20	98.8	0.135845	10.0049	185.953	16526.2	2.026	0.169034	1.46667	5.96487	0.548611	1.1	NaN	NaN
9004	48	0	NaN	NaN	NaN	NaN	-17	322.7	-17.6	580.3	-11.1	155.3	30.8659	-29.101	18.114	0.9	1.8	180.007	6.8923	7.1	1.141	1.877	0.904	43	14.55	4	5.4	0.085181	NaN	NaN	NaN	NaN	NaN	NaN	NaN	0.548611	1.91667	NaN	NaN
10001	49	0	11.5	2.1	97	3.4	-16.8	168.8	-16.2	506.9	-23.2	144.8	67.4918	-23.302	26.127	1.4	2.9	180.041	4.2967	10.4	1.106	2.433	0.862667	29	6.62	4	4.8	0.0587371	10.0085	17.187	9759.32	7.873	10.097	0.933333	2.80605	0.420139	0.166667	NaN	NaN
10003	49	0	15.8	2.2	69	2.3	-18.9	842.9	-16.7	667.6	-24.4	108.1	85.1707	-31.346	32.497	0.6	1.2	180.05	5.7136	7.7	1.377	3.545	0.601667	13	0.6	10	1.7	0.0981604	12.468	7.885	4306.31	2.059	7.00889	6.4	5.04818	0.420139	1.15	NaN	NaN
11001	47	0	17.9	1.2	40	20	-16.7	280.8	-25.1	571.5	-19.4	211.1	12.9573	-28.678	12.626	0.9	2.6	157.2	6.5468	8.4	1.143	1.733	1.087	50.0043	137.91	1	20.1	0.100453	NaN	NaN	NaN	NaN	NaN	NaN	NaN	0.541667	0.166667	NaN	NaN
11002	47	0	16	1.2	44	NaN	-8.9	258.2	-15.8	437.8	-13.4	291.8	29.2622	-24.205	16.536	1	2.1	166.4	6.499	8.2	0.976	1.196	0.940667	18	135.81	7	150	0.0675262	NaN	NaN	NaN	NaN	NaN	NaN	NaN	0.541667	0.483333	NaN	NaN
11003	47	0	15	1.2	57	18	-17.8	322.1	-18	297.3	-17.8	303.4	NaN	NaN	NaN	NaN	NaN	NaN	NaN	NaN	NaN	NaN	NaN	NaN	NaN	NaN	NaN	NaN	10.0083	61.214	9758.81	2.717	0.627622	7.81667	3.44885	0.541667	0.783333	NaN	NaN
11004	47	0	16	1.4	130	15	-17.4	223.6	-19	231.3	-20	141.3	50.0743	-34.14	30.827	1	2.2	180.021	6.1415	10.9	1.275	1.744	0.868333	43	14.99	8	5.1	0.0531058	49.583	89.714	15523.2	4.3	1.85241	4.16667	5.33754	0.541667	1.18333	NaN	NaN
11005	47	0	14	1.3	48	3	-16.5	727.3	-9.3	734.7	-11.8	456.3	30.8563	-20.185	20.351	0.8	1.3	123.2	11.1265	9.8	0.765	1.447	1.56967	50.005	22.69	20	150	0.0439757	NaN	NaN	NaN	NaN	NaN	NaN	NaN	0.541667	2	NaN	NaN
11006	47	0	17.5	1	93.1	11	-11.3	366.6	-21.5	307.7	-9.5	374.3	36.8614	-15.429	13.929	0.9	2	180.056	8.8075	17.3	0.601	1.859	1.479	50.0023	23.27	20	150	0.0891089	22.386	16.393	12930.9	1.695	2.66569	3.36667	5.18829	0.541667	2.5	NaN	NaN
12001	47	0	14	1.2	94	1.9	-17.6	129.7	-21	149.5	-14.6	181.1	29.2231	-32.562	8.48	1	2.8	180.084	3.5146	10	1.07	2.381	0.819667	30	6.39	10	2	0.0424885	61.412	300	10674.4	1.111	0.617832	3.96667	2.74496	0.458333	1.5	NaN	NaN
12002	47	0	14.7	1.2	76	6	-17.1	273.3	-20.4	347.9	-17.3	105.7	39.8604	-26.154	13.062	1	3	160	4.4482	10	1.22	1.882	0.939333	50.0015	20.39	1	12	0.0932879	10.0046	11.597	15884.5	1.827	3.08094	3.05085	4.39054	0.458333	2.16667	NaN	NaN
12003	47	0	11.5	1.2	32.7	20	-16.7	326.3	-8.4	326.1	-12.6	243.1	27.1759	-19.54	16.972	1.5	4.2	96.6	3.7051	10.2	NaN	2.7	0.805333	30	6.2	6	1.2	0.0628333	10.0093	21.399	4070.07	2.115	0.848873	NaN	NaN	0.458333	2.75	NaN	NaN
12004	47	0	11	1.5	21.6	8	-16.8	323.2	-8.6	370.6	-1	101.1	57.2027	-16.711	13.559	1.5	4.2	180.046	4.1715	12.8	NaN	2.016	0.887	30	7.36	19	4	0.0506588	NaN	NaN	NaN	NaN	NaN	NaN	NaN	0.458333	3.5	NaN	NaN
13001	45	0	12.4	1.1	76	18	-20.1	251.2	-9.9	196.7	-9.9	54.7	NaN	NaN	NaN	NaN	NaN	NaN	NaN	NaN	NaN	NaN	NaN	NaN	NaN	NaN	NaN	NaN	NaN	NaN	NaN	NaN	NaN	NaN	NaN	0.46875	0.5	NaN	NaN
13002	45	0	18	0.845	76	12	-11.5	410.8	-26.3	428.2	-7.4	300.3	NaN	NaN	NaN	NaN	NaN	NaN	NaN	NaN	NaN	NaN	NaN	NaN	NaN	NaN	NaN	NaN	NaN	NaN	NaN	NaN	NaN	NaN	NaN	0.46875	0.75	NaN	NaN
13003	45	0	17	0.928	67	26	-17.6	314.6	-17.8	386.6	-12.8	150.8	NaN	NaN	NaN	NaN	NaN	NaN	NaN	NaN	NaN	NaN	NaN	NaN	NaN	NaN	NaN	NaN	NaN	NaN	NaN	NaN	NaN	NaN	NaN	0.46875	0.916667	NaN	NaN
14001	46	0	20	0.915	70	17	-19.1	401.8	-19.6	397.7	-21.3	117.7	48.6099	-19.121	16.087	1	1.9	126.2	12.8529	10.3	1.029	1.386	1.21567	50.0021	131.62	1	150	0.0952304	NaN	NaN	NaN	NaN	NaN	NaN	NaN	0.513889	0.283333	NaN	NaN
14002	46	0	15	1.2	60	8.5	-17.1	533	-18.7	530.5	-16.3	277.2	21.1377	-20.979	33.19	0.8	1.4	180.015	9.3289	7.8	1.09	1.962	1.35933	50.0083	133.87	1	24.7	0.0580416	NaN	NaN	NaN	NaN	NaN	NaN	NaN	0.513889	0.833333	NaN	NaN
14003	46	0	17	0.48	68	31	-18.8	730.3	-11	492.2	-21.6	143	28.2246	-38.361	38.064	0.8	1.6	180.008	6.7007	11.6	1.112	1.306	0.824333	40	13.15	20	7.2	0.123205	NaN	NaN	NaN	NaN	NaN	NaN	NaN	0.513889	1.25	NaN	NaN
14004	46	0	15	1.9	75	-0.1	-18.9	620.6	-17.3	418.9	-5.6	169.7	42.6951	-33.718	37.955	0.7	1.7	80	7.2828	14.7	1.095	1.617	0.896	34	8.84	7	6.8	0.0644927	NaN	NaN	NaN	NaN	NaN	NaN	NaN	0.513889	1.66667	NaN	NaN
14005	46	0	18	0.932	65	6.7	-7.5	512.5	-18.4	346.9	-11.1	258.4	NaN	NaN	NaN	NaN	NaN	NaN	NaN	NaN	NaN	NaN	NaN	NaN	NaN	NaN	NaN	NaN	NaN	NaN	NaN	NaN	NaN	NaN	NaN	0.513889	2.08333	NaN	NaN
15001	46	0	16	0.802	45	14	-17.3	657.3	-13.2	470.7	-16.1	429.6	40.9429	-24.231	33.238	1.1	2.2	141.8	7.9325	12	0.958	1.319	1.01933	50.0001	129.29	20	5.5	0.0831251	NaN	NaN	NaN	NaN	NaN	NaN	NaN	0.604167	1.03333	NaN	NaN
16001	45	0	16	1.3	40.3	5.4	-27.2	362.9	-21	709.1	-27.7	120.8	50.7328	-27.745	19.091	0.8	1.7	101.4	4.6032	14.3	1.098	1.968	0.947	38	13.28	5	11.9	0.0741209	NaN	NaN	NaN	NaN	NaN	NaN	NaN	0.527778	0.5	NaN	NaN
16002	45	0	21	1.5	53	56	-16.3	507.1	-20.1	523.4	-17.8	270.8	26.6861	-27.204	30.212	1.2	2.1	180.051	7.8799	9.3	1.043	1.953	1.09233	50.0054	131.25	9	9.9	0.0646943	NaN	NaN	NaN	NaN	NaN	NaN	NaN	0.527778	1	NaN	NaN
16003	45	0	17	0.841	66	15	-18.7	441.9	-26.9	427.7	-21.3	110.5	37.3308	-13.885	19.392	0.9	1.9	59.8	4.5669	19.8	0.96	1.165	0.988333	50.006	31.24	1	57	0.0670699	300	300	132.535	1	1.77225	2.77966	5.27135	0.527778	1.21667	NaN	NaN
16004	45	0	14	0.922	49	34	-27.5	271	-20	534.8	19	64.8	26.6447	-28.477	18.241	1.2	4.3	45.5	1.8754	10.7	NaN	3.801	NaN	NaN	NaN	NaN	NaN	NaN	100.45	138.854	2067.17	1.99	1.9995	2.3	3.80735	0.527778	1.66667	NaN	NaN
16005	45	0	12	1.6	69	21	-28.4	325.6	-21.7	478.9	-29	116.2	12.7009	-30.404	20.242	0.8	2.3	180.069	2.2243	16.3	0.994	1.744	NaN	NaN	NaN	NaN	NaN	NaN	NaN	NaN	NaN	NaN	NaN	NaN	NaN	0.527778	2.5	NaN	NaN
17001	46	0	13	1.2	43.3	14	-27	716.7	-13.5	685.8	-19.3	192.2	37.042	-26.738	38.731	0.9	1.5	86.8	7.4837	10	1.06	1.545	1.02767	50.0086	20.13	11	2.3	0.0405293	NaN	NaN	NaN	NaN	NaN	NaN	NaN	0.513889	0.583333	NaN	NaN
17002	46	0	17	0.935	60	17	-18.8	584.1	-18.9	579.9	-20.7	121	45.2301	-29.746	23.725	0.8	1.9	180.032	4.8588	10.6	1.085	2.005	0.95	43	15.97	3	21.1	0.0840201	NaN	NaN	NaN	NaN	NaN	NaN	NaN	0.513889	1.16667	NaN	NaN
17003	46	0	9.1	3.3	51	7.3	-18.4	261.2	-16.2	562.1	-23.9	136.6	NaN	NaN	NaN	NaN	NaN	NaN	NaN	NaN	NaN	NaN	NaN	NaN	NaN	NaN	NaN	NaN	105.35	170.623	3424.65	1.553	17.4128	0.0666667	8.01479	0.513889	1.5	NaN	NaN
17004	46	0	16.5	1.6	60	3.7	-6.8	227.2	-20.1	419.7	-17.5	313.1	20.1503	-22.688	20.508	1.7	3.3	103.9	5.0918	23.3	0.644	1.105	0.829667	28	5.39	2	3.6	0.0769115	NaN	NaN	NaN	NaN	NaN	NaN	NaN	0.513889	2.01667	NaN	NaN
17005	46	0	13.8	1.6	58	11	-16.7	367.5	-18	424.7	-16.7	202.3	NaN	NaN	NaN	NaN	NaN	NaN	NaN	NaN	NaN	NaN	NaN	NaN	NaN	NaN	NaN	NaN	NaN	NaN	NaN	NaN	NaN	4.72	6.70587	0.513889	2.35	NaN	NaN
18001	47	0	19	0.6	49	6	-20	914.2	-15.5	601.1	-17.9	280.3	24.7209	-29.384	28.782	0.6	1	180.052	13.9615	6.9	0.986	1.22	0.945	50.0037	134.68	17	6.2	0.0908185	NaN	NaN	NaN	NaN	NaN	NaN	NaN	0.458333	0.333333	NaN	NaN
18002	47	0	15.4	1.3	50	6	-17.6	538.8	-19.5	634.2	-15.5	170.1	NaN	NaN	NaN	NaN	NaN	NaN	NaN	NaN	NaN	NaN	NaN	NaN	NaN	NaN	NaN	NaN	10.0022	17.716	100516	5.616	3.94364	1.78333	3.80864	0.458333	0.75	NaN	NaN
18003	47	0	15	2.3	54	0	-19	640.6	-15.5	512.9	-18.3	222.3	22.4673	-26.206	31.132	0.7	1.3	83.8	8.678	10.3	1.068	1.128	1.30333	50.0045	133.38	7	12.1	0.0969643	19.982	16.682	11493	1.558	3.37938	3.66667	3.44583	0.458333	1.66667	NaN	NaN
18004	47	0	16.7	1.6	54	0.3	-25.9	830.3	-16.6	606.3	-15.3	220.3	51.9759	-23.137	29.079	0.7	1	180.073	9.4524	6	1.067	1.301	1.503	50.0032	138.87	12	32.5	0.0631848	110.934	81.637	8184.06	1.243	3.17704	9.35	5.35442	0.458333	2.23333	NaN	NaN
18005	47	0	20	0.822	40	7	-14.2	1006.9	-7.1	893.8	-16.5	476.9	54.5683	-33.892	32.113	1	1.6	180.005	9.4822	7.4	1.027	1.322	1.30933	50.0069	135.96	6	46.6	0.090765	109.78	174.164	8497.6	2.073	3.50618	8.73333	15.7175	0.458333	2.83333	NaN	NaN
18006	47	0	13.6	1.3	55	8	-15.3	377.1	-9.3	567.8	-12.4	552.6	63.1065	-26.799	15.128	0.8	1.9	87.3	4.0826	16.2	0.784	0.82	NaN	NaN	NaN	NaN	NaN	NaN	10.0098	109.502	11070.1	2.738	2.00381	5.2	8.08279	0.458333	3.41667	NaN	NaN
19001	45	0	15.9	1.3	44	34	-38	476.8	-20.4	562.5	-16.2	58.9	NaN	NaN	NaN	NaN	NaN	NaN	NaN	NaN	NaN	NaN	NaN	NaN	NaN	NaN	NaN	NaN	NaN	NaN	NaN	NaN	NaN	NaN	NaN	0.420139	0.333333	NaN	NaN
19002	45	0	15.6	0.82	72	1	-27.6	635.9	-12.2	504.2	-18.4	148.8	30.9289	-29.484	11.126	1.1	2.7	180.038	2.6688	8.2	1.5	2.017	0.636333	47	13.31	13	0.6	0.10785	NaN	NaN	NaN	NaN	NaN	NaN	NaN	0.420139	0.5	NaN	NaN
19003	45	0	11.6	1.3	44.3	19	-18.1	407.1	-8.4	263.7	-13.8	141.1	NaN	NaN	NaN	NaN	NaN	NaN	NaN	NaN	NaN	NaN	NaN	NaN	NaN	NaN	NaN	NaN	NaN	NaN	NaN	NaN	NaN	NaN	NaN	0.420139	1.16667	NaN	NaN
19004	45	0	10.36	1.8	68	10.5	-17.8	183.6	-6.9	240.1	-13.3	344.1	NaN	NaN	NaN	NaN	NaN	NaN	NaN	NaN	NaN	NaN	NaN	NaN	NaN	NaN	NaN	NaN	37.982	60.232	6007.93	3.535	0.198571	1.95	4.6706	0.420139	2.66667	NaN	NaN
20001	47	0	14.6	1.1	46	17	-25.8	324	-9	310	-15.7	108.9	41.8777	-39.468	15.747	2.6	9	104.9	1.1345	20	NaN	5	NaN	NaN	NaN	NaN	NaN	NaN	NaN	NaN	NaN	NaN	NaN	NaN	NaN	0.555556	0.25	NaN	NaN
20002	47	0	17.8	1.1	83	4	-18.3	624.8	-20.2	471.4	-19.1	162.2	47.4922	-34.389	12.983	1.1	2.9	180.041	2.4099	10.8	1.074	1.897	0.807667	34	8.38	9	6.1	0.0643416	300	81.838	15499.7	1	0.6663	15.0769	7.16856	0.555556	0.416667	NaN	NaN
20003	47	0	17	0.964	64	14	-16.1	410.5	-22.6	478.4	-18.6	177.6	NaN	NaN	NaN	NaN	NaN	NaN	NaN	NaN	NaN	NaN	NaN	NaN	NaN	NaN	NaN	NaN	10.0019	22.134	49528.7	1.997	0.866033	12	6.40655	0.555556	1.41667	NaN	NaN
20004	47	0	13	1.1	68	13	-19.2	447.3	-17.6	322.7	-20.7	163.3	29.4054	-23.294	11.985	1.1	5.2	48.6	1.0007	NaN	NaN	NaN	NaN	NaN	NaN	NaN	NaN	NaN	82.489	75.125	9607.82	1.09	1.75313	7.67273	5.45545	0.555556	1.95	NaN	NaN
21001	45	0	13	1.5	52	11	-19.5	425.1	-10.8	431.6	-22.5	81.6	62.8176	-23.961	17.103	1.6	6.9	104.9	1.1345	11.9	NaN	7.561	NaN	NaN	NaN	NaN	NaN	NaN	NaN	NaN	NaN	NaN	NaN	NaN	NaN	0.576389	0.533333	NaN	NaN
21002	45	0	18	0.654	37	6.9	-18.7	656.3	-17.6	470.2	-14.8	235.7	27.7212	-29.188	18.489	1.3	3.3	123.7	2.5877	9.4	NaN	2.225	NaN	NaN	NaN	NaN	NaN	NaN	NaN	NaN	NaN	NaN	NaN	NaN	NaN	0.576389	0.75	NaN	NaN
22001	45	0	19.25	0.83	68	5.2	-30	676.2	-11.6	357	-15.2	126.2	37.9233	-36.826	19.579	1	2.3	180.09	5.5917	6.4	1.156	1.827	0.839333	46	15.39	13	3.1	0.0983238	NaN	NaN	NaN	NaN	NaN	NaN	NaN	0.622222	0.55	NaN	NaN
22002	45	0	19	0.884	83.5	17	-9	312.7	-26	279.6	-14.4	207.5	42.292	-12.53	11.047	3.5	4.5	105.3	1.0004	NaN	NaN	NaN	0.571667	45	9.91	19	2.3	0.127319	10.0027	13.197	57401.8	2.929	4.38772	1.6	4.10498	0.622222	0.766667	NaN	NaN
22003	45	0	21.2	0.5	36.6	12	-19.7	1016.3	-18.9	611.4	-18.9	354.8	32.638	-21.846	17.809	0.6	1.1	166.1	4.0098	8.1	2.247	1.151	0.481667	50.0022	36.97	20	4.6	0.207468	25.071	76.525	14412	1.381	3.9805	8.56667	7.25797	0.622222	1.73333	NaN	NaN
23001	45	0	13.4	1.7	64	1.2	-19.4	549.3	-17.6	502.9	-19.7	226.1	33.3837	-24.357	22.339	1.6	4.9	26.7	2.838	24.3	1.095	1.529	NaN	NaN	NaN	NaN	NaN	NaN	NaN	NaN	NaN	NaN	NaN	NaN	NaN	0.552083	0.833333	NaN	NaN
23002	45	0	16	1	63	12	-9.3	309.1	-17.7	398.5	-19.4	303.5	NaN	NaN	NaN	NaN	NaN	NaN	NaN	NaN	NaN	NaN	NaN	NaN	NaN	NaN	NaN	NaN	NaN	NaN	NaN	NaN	NaN	NaN	NaN	0.552083	1	NaN	NaN
23003	45	0	14.5	1.8	36.8	2	-19	768.8	-15.9	556.9	-20.9	243.4	60.5721	-31.372	21.79	1.3	5	120	1.691	25.4	NaN	3.317	0.278667	42	23.08	11	1	0.201833	NaN	NaN	NaN	NaN	NaN	NaN	NaN	0.552083	1.25	NaN	NaN
23004	45	0	21	0.737	83.6	16	-25.1	435.1	-22.3	397.3	-17.5	89.4	NaN	NaN	NaN	NaN	NaN	NaN	NaN	NaN	NaN	NaN	NaN	NaN	NaN	NaN	NaN	NaN	NaN	NaN	NaN	NaN	NaN	NaN	NaN	0.552083	1.66667	NaN	NaN
23005	45	0	10	3.4	60.5	5.3	-24.5	285.3	-15.5	666	-25.2	200.6	31.1837	-22.143	7.734	1.2	6.6	48.6	1.0007	NaN	NaN	NaN	0.457	50.0081	21.74	5	0.5	0.115261	97.562	146.466	1895.93	1.604	9.1565	NaN	NaN	0.552083	1.88333	NaN	NaN
24001	45	0	14	2.6	72.3	8.1	-28.8	327.8	-18.9	317.2	-26.6	86.3	80.7357	-43.505	16.523	1.7	5.9	48.6	1.0007	NaN	NaN	NaN	0.166667	50.0072	124.59	2	1.1	0.449405	NaN	NaN	NaN	NaN	NaN	NaN	NaN	0.607639	0.25	NaN	NaN
24002	45	0	15.6	0.843	43	21	-20	571.8	-11.3	296.9	-18.8	141.3	NaN	NaN	NaN	NaN	NaN	NaN	NaN	NaN	NaN	NaN	NaN	NaN	NaN	NaN	NaN	NaN	NaN	NaN	NaN	NaN	NaN	NaN	NaN	0.607639	0.533333	NaN	NaN
24003	45	0	12.8	1.1	82.5	7.1	-19	308.3	-19.9	215.2	-17.2	128	52.2255	-24.301	15.625	1.5	5.3	65.5	2.0716	30.1	NaN	2.19	0.650667	37	5.22	13	0.2	0.0196784	80.283	160.759	13009.2	1.682	1.80297	1.96667	5.53484	0.607639	0.9	NaN	NaN
24004	45	0	13.7	1.2	55.6	5.8	-18.9	641.5	-8.5	285.6	-13.1	253.1	39.8306	-33.587	24.296	1.7	4.2	140.8	2.9864	19.3	0.953	1.484	0.189333	48	38.82	7	1.1	0.284582	NaN	NaN	NaN	NaN	NaN	NaN	NaN	0.607639	1.68333	NaN	NaN
24005	45	0	13.11	1.5	69.4	1.4	-17.7	227.2	-26.4	299.1	-16.3	201.9	44.1026	-27.64	7.656	1.3	4.1	98.2	1.6433	18.8	NaN	2.848	0.76	40	18.59	13	2.5	0.0699684	76.287	79.378	10059	1.894	1.91499	4.35593	4.03494	0.607639	2	NaN	NaN
24006	45	0	12.93	1.3	37.5	2.9	-18.2	463.1	-15.6	374.8	-8.2	199.1	41.112	-16.65	14.165	1.7	7.2	180.087	2.7202	26.3	0.867	3.818	0.395	50.001	44.14	8	0.4	0.135133	10.0015	176.3	5096.6	4.13	6.83181	2.28333	5.06928	0.607639	2.76667	NaN	NaN
25001	48	0	15.2	1.2	58.4	2.5	-17.3	363.2	-21.7	1025.5	6.8	265.7	27.851	-48.34	21.327	4.7	6.9	141.2	1.0003	NaN	NaN	NaN	0.403	50.0048	27.6	20	200	0.228854	56.694	113.785	8068.5	3.477	1.47138	NaN	NaN	0.520833	0.3	NaN	NaN
25002	48	0	6.6	4.2	50.7	-1.3	-16.1	166.9	-7.6	240.8	0.9	81.6	76.7686	-24.187	18.141	4.2	10.9	112.2	1.0039	NaN	NaN	NaN	0.103333	29	12.46	20	4.7	0.121823	10.0075	22.134	49528.7	1.997	3.10503	0.883333	3.42905	0.520833	0.85	NaN	NaN
25003	48	0	13.7	1.7	85.9	1.1	-11.9	526.5	-15	1055	-18.2	112.2	63.1469	-30.082	4.565	0.8	3.1	106.6	3.8261	16.5	0.721	2.329	0.953	36	12.53	11	25.4	0.0832829	30.116	96.767	14969.5	1.792	3.80032	5.76271	4.4884	0.520833	1.58333	NaN	NaN
25004	48	0	24.11	0.62	90	-1.3	-17.2	1283.3	-28.4	1221.8	-3.3	124.7	33.7377	-18.568	24.353	0.7	1.2	180.098	1.6941	11.5	NaN	1.644	0.585667	50.0082	30.47	20	3.6	0.280752	10.0052	195.775	41493.7	2.011	1.88507	19.4138	7.35618	0.520833	2.26667	NaN	NaN
25005	48	0	12.81	1.3	94	-1.2	-12.1	705.1	-16.1	1022.7	-0.9	191.5	49.2673	-18.236	7.019	0.9	3.2	180.04	6.5737	13.6	1.154	2.725	1.095	50.0044	138.98	9	51.4	0.0832303	63.401	82.18	18261.4	2.176	3.59927	6.57143	4.65233	0.520833	3.03333	NaN	NaN
25006	48	0	9.75	3.1	52.6	2.7	-12.3	300.9	-8.1	347.6	2.1	96.9	63.4612	-14.753	13.236	3.7	10.1	180.015	1.0273	NaN	NaN	NaN	0.153333	50.0013	110.45	9	0.5	0.104909	10.0048	102.097	5028.94	1.317	3.1489	0.916667	4.45967	0.520833	3.73333	NaN	NaN
26003	49	0	24.8	0.504	41.5	20	-18.7	1650.4	-17.7	1600.7	-19.8	446.5	28.2365	-17.476	11.973	0.5	0.8	141.2	1.0003	NaN	NaN	NaN	0.173	49	10.35	20	200	0.513286	NaN	NaN	NaN	NaN	NaN	7.18333	3.96617	0.642361	1.75	NaN	NaN
27001	49	0	10.9	1.2	42.1	20	-15.5	95.2	-16	444.7	-24.1	101.4	36.3111	-21.851	9.532	2.4	8	75.4	0.9704	17.7	NaN	8.947	NaN	NaN	NaN	NaN	NaN	NaN	NaN	NaN	NaN	NaN	NaN	NaN	NaN	0.496528	0.583333	193.333	184.444
27002	49	0	15.5	1.3	31	23.2	-17.3	312.8	-28.8	498.5	-17.3	170	45.5781	-24.882	23.946	2.2	3.7	21.9	3.0257	11.4	1.798	2.117	0.192	50.0027	43.66	9	0.6	0.28735	14.275	6.566	7470.4	2.459	4.03845	NaN	NaN	0.496528	0.75	182.222	182.222
27003	49	0	19.16	0.5	50	33	-19.9	443.3	-22.2	373.2	-18.3	102.3	32.3642	-13.682	10.295	0.7	1.7	129.5	1.8131	8.2	NaN	1.765	0.744333	39	10.4	17	1.2	0.0895891	10.0082	13.248	91429.4	4.513	5.28019	NaN	NaN	0.496528	1.43333	128.889	224.444
27005	49	0	12	1.3	43.3	23	-27.5	180.6	-21	657.8	-30.3	50.6	31.6241	-24.017	9.969	1.6	6.9	25.3	1.2896	15.7	NaN	2.599	NaN	NaN	NaN	NaN	NaN	NaN	16.954	13.919	9372.88	2.544	9.53589	NaN	NaN	0.496528	2.28333	148.889	148.889
28001	49	0	16	1.3	25	12	-18	206.1	-18	763.6	-29.1	81.8	33.5499	-10.295	4.13	1.8	3.6	30.5	2.0004	10.9	NaN	6.312	0.393667	50.004	55.45	2	1.1	0.376647	10.0024	20.178	15839.8	2.246	6.96146	NaN	NaN	0.635417	0.75	142.222	135.556
28002	49	0	7.4	1	30	20	-18.4	362.1	-20.1	728.5	-11.4	108.1	40.0593	-23.682	14.73	1.5	6.8	67.7	6.5636	13.9	1.259	2.689	0.814	31	6.36	10	0.8	0.0489054	10.0045	30.704	21887.8	3.986	2.78507	NaN	NaN	0.635417	1.41667	131.111	102.222
28003	49	0	14	1.1	40	17	-20.9	201	-17	485	-21.1	83.8	109.011	-14.506	9.878	2.3	6	93.7	2.1826	14.6	NaN	2.912	0.153333	50.0054	110.45	8	0.3	0.0761863	10.007	45.386	24280.5	1.85	1.31614	2.76667	3.0574	0.635417	2.01667	97.7778	124.444
29001	49	0	17	0.8	54	17	-27.6	439.6	-18.9	608.3	-28.1	106.9	30.4166	-25.543	23.641	2	4.5	78.3	3.2445	17	1.041	1.934	NaN	NaN	NaN	NaN	NaN	NaN	NaN	NaN	NaN	NaN	NaN	NaN	NaN	0.628472	0.283333	131.111	140
29002	49	0	11	1.4	115	9.8	-28.9	122.8	-18.7	195.1	-58.8	11.4	38.1648	-19.185	16.083	2.9	8.3	43.4	1.3355	NaN	NaN	NaN	0.127333	50.0034	24.89	10	2.7	0.0595333	NaN	NaN	NaN	NaN	NaN	NaN	NaN	0.628472	0.516667	115.556	122.222
29003	49	0	13	1.1	44.2	6.7	-18.7	255.8	-19.8	593.7	-27.5	65.5	84.6947	-20.833	10.62	2.2	8.1	61.9	2.2861	13	NaN	5.35	0.171667	50.007	33.98	9	1.6	0.224608	NaN	NaN	NaN	NaN	NaN	NaN	NaN	0.628472	0.75	88.8889	117.778
29004	49	0	16	1.1	14	3.7	-22.7	605.1	-17.9	1545.7	7.8	169.5	30.5447	-22.207	18.3	2.1	6.1	180.049	3.9362	9.6	1.083	2.387	0.848	30	6.52	9	4.2	0.0510982	10.0042	10.5	65253.1	4.588	3.07394	2.13333	3.12806	0.628472	1.03333	135.556	97.7778
29005	49	0	14.3	1.2	20.3	6.7	-25.1	731.9	-16.7	1047	2.9	223.7	46.1127	-23.295	25.533	3.3	5.9	148.6	3.9031	10.1	1.188	3.003	0.411333	26	4.59	5	0.5	0.203634	10.0008	5.778	13332.8	1.555	1.55549	1.76667	3.65156	0.628472	1.75	117.778	93.3333
29006	49	0	14	0.45	71	45	-28.8	379.6	-19.3	523.7	-26.9	64.6	19.46	-20.894	10.295	1.5	4.4	86.8	1.0005	NaN	NaN	NaN	NaN	NaN	NaN	NaN	NaN	NaN	NaN	NaN	NaN	NaN	NaN	NaN	NaN	0.628472	2.41667	86.6667	88.8889
29007	49	0	13	1.1	24.4	11.6	-22.6	221.8	-18.4	722.4	-14	209	72.6048	-18.89	9.42	2.1	7.8	141.9	1.1599	20.7	NaN	5.648	0.153333	50.0063	110.45	10	1.7	0.18502	NaN	NaN	NaN	NaN	NaN	NaN	NaN	0.628472	2.36667	91.1111	126.667
30001	46	0	22	1	45	20.1	-27.5	404.6	-20.5	594	-27.6	183.4	27.2518	-27.781	22.868	1.9	6.3	95.6	2.8585	15	1.093	2.678	0.560667	47	10.37	3	0.5	0.0990324	10.0088	100.884	14995.6	1.347	6.50491	5.68333	5.22372	0.545139	0.5	106.667	200
30002	46	0	15.7	1.1	56	22	-29.5	466.1	-18.9	435.7	-28.3	70.8	26.5338	-26.388	27.924	1.9	5.8	10.1	1.556	17.3	NaN	2.122	0.256667	50.0009	112.81	4	0.5	0.125518	88.373	73.464	14052.1	1.228	3.23258	1.08333	7.23699	0.545139	1.41667	133.333	188.889
30003	46	0	13.5	0.72	61	29	-28.9	427.6	-20.6	402.9	-27.7	162.6	22.1016	-16.134	14.313	1.9	5.3	121.5	3.5174	11.9	1.126	2.641	0.457333	50.0009	14.33	6	1.8	0.371203	300	300	7981.84	1.038	2.83075	5.3	6.74118	0.545139	1.96667	146.667	177.778
31001	43	0	15	0.83	40	17	-28.7	706.9	-15.8	1041.5	-24.2	81.7	30.122	-18.27	20.671	1.1	3.3	180.099	2.9343	7.5	1.307	3.696	0.798	32	7.09	12	0.5	0.0742755	NaN	NaN	NaN	NaN	NaN	NaN	NaN	0.565972	0.583333	137.778	193.333
31002	43	0	14.4	1.1	55	3.7	-19.2	496.9	-16.7	481	-20.1	138.6	43.4662	-23.488	22.329	1.2	3.7	87.6	2.9023	10.1	1.198	1.657	0.453333	50.0076	137.85	10	0.8	0.253677	NaN	NaN	NaN	NaN	NaN	NaN	NaN	0.565972	1.33333	115.556	180
31003	43	0	13.3	1	29	13	-27	381.6	-16.4	663.4	-26.2	260.4	45.3108	-26.672	15.574	2	7.6	58.4	2.0011	11.9	1.521	2.082	0.231	50.0088	34.14	4	0.5	0.132768	NaN	NaN	NaN	NaN	NaN	NaN	NaN	0.565972	2.03333	128.889	217.778
31004	43	0	11	1.2	26	17	-17.9	392.9	-17.2	495.8	-18.5	231.3	57.5924	-17.761	10.203	2	7.4	60.7	3.0959	19.7	NaN	1.644	0.169	50.0098	59.68	9	0.6	0.0468204	NaN	NaN	NaN	NaN	NaN	NaN	NaN	0.565972	2.41667	NaN	NaN
31005	43	0	15	1	60	14	-17.3	232.1	-17.7	325	-19.6	171.4	37.0332	-17.375	9.104	5.8	5.7	71.6	2.0007	14.9	NaN	1.831	0.228333	50.0016	36.67	8	2.1	0.190575	NaN	NaN	NaN	NaN	NaN	NaN	NaN	0.565972	3.41667	NaN	NaN
31006	43	0	13.5	1.1	32	11	-29	610.4	-16.8	646.3	-27.4	209	37.424	-23.794	23.499	1.2	4.3	60	2.6028	17.1	1.117	2.484	0.170333	50.0064	53.94	6	1	0.0701215	72.521	109.864	16000.3	1.381	2.33942	0.883333	4.02218	0.565972	3.75	115.556	153.333
32001	46	0	15.5	1.1	22.7	14	-25.6	441.7	-18	991.6	-20.4	274	29.6831	-26.347	14.781	6	12.6	101.6	2.2573	13.1	1.137	4.048	0.798667	33	7.56	10	0.9	0.0602312	174.766	300	16134.9	1.02	2.79143	4.9661	5.33929	0.5625	0.5	111.111	175.556
32002	46	0	16.45	1	48.7	6	-29	580.7	-17.1	663.5	-25.4	155.9	37.081	-22.115	22.614	1.4	2.9	164.7	3.7126	7.9	1.228	2.057	0.591667	13	0.64	11	1	0.187621	300	111.911	4485.11	1	1.08784	NaN	NaN	0.5625	1.31667	131.111	211.111
32003	46	0	15.8	1.4	55.4	6.7	-18.5	381.7	-16.6	411	-19.7	232.1	56.5413	-18.84	15.371	1.4	3.3	180.051	2.7145	11.3	1.062	1.642	0.616	50.0002	30.2	12	1.3	0.174639	163.623	234.162	5995.53	1.167	1.36751	NaN	NaN	0.5625	1.95	142.222	184.444
32004	46	0	16	0.631	37	27	-29.6	500.7	-25.4	444.6	-28.3	173.7	52.8288	-24.801	17.253	1	2.7	45.1	4.306	17.3	1.075	1.24	0.741667	43	13.18	8	3.6	0.090337	10.0083	76.764	20856.6	1.927	0.929897	2.58621	5.66052	0.5625	2.46667	166.667	191.111
32005	46	0	13	1.5	40	25	-27	364.4	-16.9	620.5	-28.9	84.9	42.299	-18.941	7.182	1.3	5.5	40.3	1.0869	NaN	NaN	NaN	0.458333	50.0094	49.76	8	0.2	0.192736	11	6.815	8065.2	1.99	2.53825	2.65	7.18339	0.5625	3.03333	177.778	166.667
33001	46	0	19.5	0.875	40	7	-28.3	651.5	-35.2	858.8	-27.7	43.1	18.7321	-26.459	20.162	1.6	5.6	180.078	2.3617	8.1	1.506	4.348	0.709	44	30.68	5	2	0.149476	10.008	26.812	10387.2	2.042	0.370071	16.8	4.87222	0.583333	0.5	242.222	151.111
33002	46	0	14	0.762	64.4	19	-28	262	-19	357.3	-27.9	132	55.5614	-20.182	11.007	1.9	6.6	50.7	1.0934	NaN	NaN	NaN	0.090667	50.0043	103.52	3	0.3	0.450384	12.411	2.638	4521.73	6.504	1.53399	5.89091	5.7558	0.583333	1.25	166.667	153.333
33003	46	0	16.5	1.1	29	17	-24.7	451.4	-21.7	667.1	-24.7	57.4	36.6198	-18.982	8.779	2	7.6	73.2	5.5578	11.5	1.374	4.966	0.827	31	6.94	14	0.9	0.0594337	10.0095	212.889	20246.4	1.9	2.3021	3.41667	3.7791	0.583333	3.16667	200	155.556
34001	44	0	15	1.1	33.7	16	-27.8	396.1	-19.4	612.5	-30.1	136.9	48.988	-23.834	19.48	2	7.1	180.089	2.233	11.7	NaN	3.381	0.21	50.0035	47.26	6	0.3	0.101659	10.003	5.039	12475.5	1.391	2.18164	2.55	4.1896	0.583333	0.666667	124.444	122.222
34002	44	0	17.4	0.783	72.6	17	-28.4	441.8	-27.6	380.5	-27.4	147.9	39.1432	-18.748	16.632	1.1	3	76.4	3.0209	22.9	0.777	2.294	0.462667	50.009	38.29	11	1.1	0.150151	10.0082	110.506	11989.4	2.036	0.928847	5.01667	6.01877	0.583333	1.33333	164.444	144.444
34003	44	0	15	1.3	62	40	-19.5	267.5	-35.8	360.7	-22.8	105.4	34.7986	-3	2	2	3	180.044	1	NaN	NaN	NaN	0.148	43	8.74	20	4.7	0.418733	13.13	5.032	10168.2	4.41	2.27779	7.14035	4.22011	0.583333	1.91667	102.222	148.889
34004	44	0	11	1.1	44	28	-20.6	354.9	-20.4	401.7	-23.7	154.6	69.9535	-13.723	12.777	6	8.7	105.3	1.0004	NaN	NaN	NaN	0.136	50.009	85.72	20	200	0.211478	10.0017	5.442	5458.29	1.984	4.62056	1.78571	2.73691	0.583333	2.33333	75.5556	155.556
34005	44	0	13.6	0.66	48	47	-13.5	153.2	-35.9	486.3	-20.1	257.3	41.0317	-19.368	7.406	1.8	5.4	46.7	2.9935	28	0.846	1.069	0.304667	50.0062	44.44	4	0.4	0.217886	NaN	NaN	NaN	NaN	NaN	3.13559	3.53527	0.583333	3	106.667	108.889
35001	46	0	17.5	0.869	41	20	-28.9	595.1	-36.3	665.9	-28.4	58.9	24.3498	-24.2	21.332	1.3	3.4	180.062	6.2756	12.4	1.234	2.737	0.811	36	9.06	12	1.8	0.0559123	92.616	291.934	12250.8	1.163	1.22517	3.03333	6.29424	0.4375	0.366667	200	171.111
35002	46	0	17	0.7	21.5	22	-28.1	756.1	-26.7	1268.3	-30.4	120.4	46.4221	-27.598	25.014	1.6	4.3	85.5	5.7311	21.6	1.069	1.599	0.801	42	12.63	16	3.1	0.0697134	90.604	160.999	10569.6	1.274	8.01109	2.35	3.48371	0.4375	0.933333	160	197.778
36001	45	0	17.4	0.875	35.5	31	-28.9	601.6	-19.2	448.7	-24.8	46.7	37.8715	-24.445	18.595	1.7	6.5	104.9	1.1345	12.9	NaN	3.383	0.295667	50.0043	47.94	15	0.9	0.312917	10.0052	39.228	7799.4	1.506	3.98773	9.2	6.0875	0.465278	0.333333	115.556	213.333
36002	45	0	17.5	1.2	65	20	-27.5	420.2	-20.5	608.7	-29.5	87.3	51.3747	-29.683	21.088	2.1	7.8	71.5	4.5619	8.9	1.056	4.764	0.78	47	15.08	8	0.8	0.0635868	10.0009	290.929	21816.8	1.164	6.62809	1.53448	3.51251	0.465278	2.23333	153.333	188.889
36003	45	0	17.6	0.522	54	37	-29.6	364.6	-25.5	365	-28.7	110.3	44.1203	-24.414	16.774	2	5.4	49	2.0022	26.6	NaN	1.594	0.384	50.0095	130.46	19	0.5	0.12309	10.0027	59.905	17225.8	1.137	4.45744	3.73333	3.9673	0.465278	3.75	160	126.667
37001	46	0	14.1	1.5	40	15	-23.3	226	-18.3	547.4	-24.8	317.7	46.9333	-26.072	8.718	1.8	7.3	132.3	1.7128	30	NaN	0.851	0.155333	50.0024	111.51	6	1	0.0613302	10.0056	11.67	9676.94	1.864	1.90607	2.81356	3.2727	0.645833	0.35	88.8889	153.333
37002	46	0	17.3	1.5	31	16	-27	358.2	-28	622	-27.2	176.8	34.1986	-13.326	7.497	1.2	3	61.6	1.2809	24.2	NaN	1.609	0.421667	50.0093	26.53	15	2	0.226726	10.0075	10.354	40246.7	2.601	4.3831	3.88136	3.19877	0.645833	1.18333	106.667	144.444
37003	46	0	5.8	3.3	23	20	-12.7	381.7	-16	675.1	9.6	85.5	34.6388	-13.021	7.619	3.4	7.7	99.9	2.0023	NaN	NaN	NaN	0.083	33	24.24	3	0.4	0.177374	NaN	NaN	NaN	NaN	NaN	NaN	NaN	0.645833	1.76667	111.111	188.889
38001	49	1	21.7	1.3	66.4	4.3	-29.4	808.1	-28.9	824.7	-28.3	94	19.8983	-26.021	34.861	0.6	0.9	88	4.9873	5.9	1	1.403	1.41667	50.0078	138.13	8	200	0.0370154	10.006	5.023	49085.9	2.668	5.14046	9	4.75919	0.5625	0.5	140	186.667
39001	49	1	21.23	1.5	20.9	6.7	-27.3	482.4	-30	795.5	-20.4	57.6	33.1191	-28.035	10.488	1.1	6.5	123.9	2.0625	17	NaN	2.788	0.657	49	37.52	8	1.9	0.118387	51.135	87.826	20860.6	1.202	0.310017	5.81667	4.31799	0.572917	0.866667	177.778	200
40001	49	1	15.9	1	56.8	54	-18.8	468.3	-28.9	531.2	-18.8	101.1	39.4531	-21.993	13.031	2.6	6.7	118.9	2.643	19.6	1.342	3.036	0.103333	50.0052	108.33	18	0.5	0.293368	45.776	229.618	25222.7	1.436	4.50349	6.61667	4.40032	0.458333	0.55	211.111	164.444
41001	49	1	27.5	3.2	94.5	-0.6	-29.5	642.3	-35.7	547	-7.7	143.4	59.9421	-28.89	24.017	0.9	2.2	52.4	2.0007	20.6	NaN	4.442	0.407667	49	16.94	3	2.3	0.130358	10.0077	234.779	15904.1	1.619	9.14068	1.16667	3.96759	0.440972	0.416667	155.556	155.556
41002	49	1	30.8	2.7	65.1	-1.2	-21.5	449	-25.6	377.1	-18.3	202.6	26.6963	-24.618	32.41	4.7	5.4	26	2.9633	20.7	1.155	1.843	0.7	35	5.1	11	1.2	0.0407678	10.0032	13.363	43746.2	2.459	6.03093	0.783333	4.64032	0.440972	1.3	140	164.444
41003	49	1	5.7	8.1	44.3	1.2	-30	371.7	-24	339.8	-28.8	75.5	42.1568	-26.866	12.828	1	5.3	20	1	NaN	NaN	NaN	0.153333	50.0074	110.45	3	0.4	0.0761345	NaN	NaN	NaN	NaN	NaN	NaN	NaN	0.440972	1.91667	NaN	NaN
42001	49	1	17.11	2	43	15.9	-27.9	350.3	-21.9	768.7	-27.7	87.7	32.5606	-27.934	12.746	1.6	7.4	180.036	2.16	9.4	1.16	3.735	0.331333	50.0068	142.98	7	0.3	0.197911	NaN	NaN	NaN	NaN	NaN	NaN	NaN	0.565972	0.25	104.444	133.333
42002	49	1	2.6	2.3	34.5	3.7	-26.5	633	-36.6	678.3	-9.2	208	34.1911	-5.107	15.798	2.6	5.7	88.2	2.0955	42.5	NaN	0.81	0.328333	50.0088	134.49	20	4.4	0.205791	29.814	299.889	11662	1.246	0.0561202	6.81034	4.34697	0.565972	0.916667	111.111	151.111
42003	49	1	14.37	3.3	17.5	0.6	-27.7	331.5	-19.5	554.8	-11	213.7	39.2172	-26.113	12.451	1.6	7.1	85	1.8518	22.7	NaN	3.617	0.176667	50.0047	46.15	3	0.5	0.0498787	12.542	3.334	7417	2.491	1.74383	NaN	NaN	0.565972	1.76667	173.333	206.667
42004	49	1	15.56	2	16.2	4.9	-7.9	186.5	-12.4	441.1	-17.4	90.1	84.549	-16.215	9.013	2.2	5.7	109.2	2.2689	12.5	1.104	3.672	0.155333	50.0073	103.41	8	0.3	0.0593341	10.005	104.28	12357.4	1.962	0.140221	1.15	2.95618	0.565972	2.33333	93.3333	75.5556
43001	49	1	15	1	19.7	65	-14	526.2	-17.3	778.7	-11.6	228.2	69.7009	-24.363	10.722	1.5	6.9	180.02	4.2391	17.3	1.191	2.459	0.782	39	10.83	8	3.3	0.0525663	10.0098	229.566	24476.8	1.324	3.7535	5.76667	6.89456	0.569444	0.733333	206.667	155.556
43002	49	1	13.4	0.41	44.5	75	-7.3	274.3	-25	242.1	-8.4	62.2	42.8761	-14.943	16.347	2.8	6.2	180.041	7.6966	11.5	1.13	1.642	0.606667	32	3.74	14	0.7	0.0833355	NaN	NaN	NaN	NaN	NaN	NaN	NaN	0.569444	1.33333	242.222	180
43003	49	1	8.65	1.1	37.4	43	-30.7	143.3	-19.1	266.8	0.9	238.1	39.5312	-28.819	10.966	1.5	5.4	74.3	8.5051	12.2	1.008	2.425	0.441667	50.0031	143.3	3	0.4	0.0969643	10.0047	3.984	8033	1.28	1.32285	0.2	6.12255	0.569444	1.76667	188.889	204.444
43004	49	1	9.78	1.3	154.9	49	-24.4	282.7	-28.3	476.8	-15.6	348.3	39.4828	-21.24	10.885	1.6	7.4	111.8	1.8379	25.9	NaN	2.809	0.614333	33	6.34	10	0.8	0.0751524	12.757	89.827	8808.77	1.404	1.09593	2.45	4.283	0.569444	2.36667	231.111	155.556
44002	49	1	10	0.972	52.2	53	-9.6	183.4	-11.7	321.6	-13.9	169.7	58.0136	-18.005	6.5	2	7.5	26.2	0.2502	NaN	NaN	NaN	0.141	50.0085	102.83	20	4.6	0.132945	10.0032	3.15	20047.3	1.475	0.8337	1.66667	3.44608	0.520833	0.5	93.3333	173.333
44003	49	1	8.23	1.8	39	40.9	-25.1	224.6	-15.6	570.9	-3.5	78.4	49.6961	-19.836	18.005	3.5	10.9	86.8	1.0005	NaN	NaN	NaN	0.153333	50.0075	110.45	6	0.3	0.0334828	55.47	99.554	4310.15	1.627	1.76879	0.466667	4.80796	0.520833	1.48333	140	262.222
45001	49	1	9.46	0.9888	35.2	52	-29.4	518.9	-26	536.9	-21.7	61.2	38.0642	-26.835	18.768	1.4	5.5	25.6	2.0677	28.1	NaN	4.553	0.637	37	5.39	5	0.7	0.053204	10.0016	19.542	23593.8	1.456	3.00229	2.33333	4.4717	0.590278	0.416667	157.778	262.222
45002	49	1	8.26	0.6674	44.9	69	-9.3	263.1	-20.6	334.7	-12.1	154.8	53.5196	-10.946	8.006	1.5	3.3	180.034	2.891	11.2	1.214	1.747	0.185667	50.0093	21.84	3	0.3	0.166088	10.0087	6.099	10761	1.508	4.16832	4.7931	6.80843	0.590278	1.11667	108.889	180
47001	49	1	12.69	1.8	34.1	31	-26.2	417.9	-25	531.4	-23	105.3	40.1004	-22.034	16.571	1.7	3.7	141.3	2.317	12	NaN	3.921	0.451333	50.007	23.24	8	0.4	0.208099	NaN	NaN	NaN	NaN	NaN	NaN	NaN	0.548611	0.95	213.333	251.111
47002	49	1	11.97	2.3	48.4	30	-16.5	147.1	-38.9	208	-11.3	272.8	44.0983	-6.653	6.215	1.2	4.4	160	1	NaN	NaN	NaN	0.130667	50.0089	108.06	20	200	0.0779496	57.454	70.459	10220.2	1.481	0.704065	1.36667	6.06193	0.548611	1.33333	124.444	164.444
47003	49	1	16.13	2.7	39.1	53	-27.5	181.8	-34	313.7	-9.9	159.4	58.8755	-19.643	3.713	1.7	6.5	89.3	1.3254	17.1	NaN	1.924	0.104333	50.005	40.51	20	4.6	0.266482	10.0091	144.724	20662.9	1.434	0.610608	NaN	NaN	0.548611	2.05	153.333	166.667
47004	49	1	11.24	0.9881	35.9	47	-26.8	316.1	-27.5	266.9	-5.4	301.9	57.7937	-26.337	13.662	2	7.5	85	1.8518	21.5	NaN	2.844	0.248333	50.0023	70.12	12	1.4	0.128427	10.006	111.71	10559.9	1.768	23.6759	1.68333	2.21779	0.548611	2.6	182.222	206.667
48001	49	1	10.32	0.8789	31.3	20.1	-26.7	207.2	-20.7	423.2	-25.8	37.3	63.5197	-21.749	23.326	1.3	3.3	58.3	7.8589	14	1.093	1.663	1.00133	31	88.09	7	150	0.0105947	10.0045	16.693	18787.5	1.684	3.29395	0.333333	3.07652	0.565972	0.65	224.444	246.667
48002	49	1	12.46	1.8	47.6	13	-26.7	227.4	-21.9	413.9	-24.3	95.2	37.5139	-23	27.008	1.3	2	27.3	8.7537	7.5	1.107	1.997	1.05333	50.0081	135.49	8	200	0.0140798	10.0065	109.77	23341.9	1.907	0.501079	8.63333	6.86221	0.565972	1.31667	171.111	135.556
49001	49	1	14.2	1	54.1	42	-19.5	223	-17.2	314.7	-22.6	118.3	108.818	-21.566	25.533	1.3	2.9	86.9	3.5346	15.5	1.045	1.557	0.773	26	4.68	7	1.2	0.0463853	NaN	NaN	NaN	NaN	NaN	NaN	NaN	0.479167	0.55	153.333	204.444
49002	49	1	13.29	2.7	43	44	-24.3	164.9	-10.3	344.9	-21.9	152.3	56.8259	-19.236	20.854	2.3	5	108	6.6167	14	1	1.736	0.520667	12	0.52	3	1	0.0644424	NaN	NaN	NaN	NaN	NaN	NaN	NaN	0.479167	0.9	162.222	168.889
49003	49	1	14.54	1.1	36.5	48.2	-28.5	513.7	-10.3	392.2	-15	138.5	29.0565	-22.593	37.435	1	2.8	70.7	5.3231	15.3	1.046	1.856	0.829	28	5.47	6	1.4	0.0139901	NaN	NaN	NaN	NaN	NaN	NaN	NaN	0.479167	1.2	244.444	186.667
49004	49	1	15.56	1.6	44.4	35	-23.7	274.7	-18.5	292.5	-17.5	186.9	61.5805	-21.8	19.653	2.1	4.8	127.7	3.3246	17.7	1.079	2.12	0.649667	11	0.16	8	0.5	0.0663609	94.033	125.974	9235.54	1.966	3.32191	5.86667	3.89186	0.479167	1.6	186.667	208.889
49005	49	1	15.3	1	43.1	62	-18.6	257.7	-18.1	395.8	-23	118.9	54.9505	-14.343	12.583	1.7	4.1	109.2	2.894	16.3	0.853	5.459	0.651667	19	3.15	3	0.4	0.0498299	28.428	99.578	10432.7	1.804	0.771392	1.52632	3.09283	0.479167	2.83333	171.111	288.889
50001	49	1	11.47	1.8	32.4	35	-27.8	286.6	-16.2	511.8	-25.7	212.6	20.7789	-16.927	17.293	1.4	2.8	101.3	7.5243	11.9	1.067	2.099	0.85	28	5.87	1	3.6	0.072527	NaN	NaN	NaN	NaN	NaN	NaN	NaN	0.590278	0.283333	233.333	157.778
50002	49	1	14.23	0.922	41.1	56	-18.2	292.1	-8.7	440.4	-18.9	198	23.3359	-19.338	28.229	1.6	3.1	180.011	7.7296	10.3	1.019	1.552	0.815667	28	5.28	6	1	0.02512	35.527	82.697	2867.79	1.987	3.66757	1.71667	4.23074	0.590278	0.683333	195.556	157.778
64001	49	1	7.63	1.5	7.7	17	-17.6	236.3	-6.6	881.3	-20.7	104	43.6094	-20.467	42.918	0.8	1.7	29	9.7998	7.9	1.177	4.823	1.42667	50.009	140.65	8	200	0.0308171	NaN	NaN	NaN	NaN	NaN	NaN	NaN	0.479167	0.8	NaN	NaN
64003	49	1	8.63	0.7417	38.5	20.8	-17.4	274.1	-9.3	468.8	-21.7	74.7	38.6562	-19.358	38.31	0.8	1.5	116	9.1253	10.3	1.029	2.289	1.08667	50.0019	136.83	8	200	0.0178193	NaN	NaN	NaN	NaN	NaN	NaN	NaN	0.479167	1.11667	NaN	NaN
64004	49	1	9.72	0.695	17	17	-9.7	273.7	-9.2	498.5	-12.1	153.4	34.3096	-18.667	44.779	0.8	1.3	180.03	13.9599	7.3	1.068	2.437	1.417	50.0053	132.35	1	150	0.0527624	NaN	NaN	NaN	NaN	NaN	NaN	NaN	0.479167	1.38333	NaN	NaN
64005	49	1	9.68	0.6616	50.7	20.8	-8.5	172.9	-17.1	350.2	-11.6	112.6	50.0389	-19.307	27.395	1.5	2.4	180.022	9.1323	11.1	0.919	7.115	1	28	112.07	1	150	0.0127808	NaN	NaN	NaN	NaN	NaN	NaN	NaN	0.479167	1.58333	NaN	NaN
64006	49	1	9.03	0.6783	66.4	54	-13.4	302.9	-35.7	664.8	-12.1	501.5	52.5224	-21.739	22.542	1.4	3.7	180.06	7.5589	22.9	0.716	3.621	0.967667	36	50.19	1	150	0.0470139	NaN	NaN	NaN	NaN	NaN	NaN	NaN	0.479167	1.78333	NaN	NaN
65001	49	1	13.47	0.4524	59.6	20	-9.1	357.7	-19.3	333.8	-13.7	136.2	38.8113	-19.521	44.362	0.7	1.3	180.02	14.2505	9.1	1.066	1.269	1.15533	50.0022	137.06	4	22.5	0.122686	10.003	12.512	54604.9	3.974	2.00001	2	2.48219	0.579861	0.483333	NaN	NaN
65002	49	1	12.73	0.3733	16.8	33	-15.5	539.3	-10.2	635.8	-18.7	182.4	25.9842	-23.916	46.082	1.2	2.7	116	8.1081	12.1	1.157	1.781	1.07	50.0093	138.04	4	20.3	0.0863451	10.0048	235.334	15638	1.895	5.94944	0.966667	3.68367	0.579861	1.38333	NaN	NaN
65003	49	1	12.57	0.448	47.7	22	-14.3	460.6	-23	475.1	-17.9	165.4	27.8552	-14.933	39.754	0.6	1.3	180.071	13.1252	9.6	1.073	1.475	1.329	50.0054	133.95	1	33.1	0.0775341	10.0026	157.808	22883.4	1.913	2.64141	5.63333	3.10129	0.579861	2.26667	NaN	NaN
67002	49	1	8.08	0.3423	21.8	60	-20.3	183.7	-17	700.6	23.8	52.6	30.0921	-11.342	24.75	0.8	1.6	85.3	3.1729	14.7	1.354	1.419	0.912667	30	7.64	1	15.2	0.0909256	NaN	NaN	NaN	NaN	NaN	NaN	NaN	0.479167	0.7	NaN	NaN
67003	49	1	9.12	0.5306	54.5	22	-20.4	415.1	-16.8	403.6	-6.4	116.6	35.6979	-18.25	52.317	0.4	0.7	98.8	13.9495	7	1	1.244	1.41867	50.0085	139.56	8	200	0.0428239	10.0044	9.148	69499.1	5.401	2.72503	NaN	NaN	0.479167	1	NaN	NaN
67004	49	1	5.5	0.5919	38.2	24.4	-17.5	439.9	-16.2	620.8	-21.4	36.8	85.312	-16.561	42.135	0.5	0.9	68	11.283	9.6	1.083	1.51	1.37267	50.0093	133.32	8	200	0.0349865	10.0091	16.852	27394.7	10.245	1.649	NaN	NaN	0.479167	1.61667	NaN	NaN
67005	49	1	6.77	0.6283	27	73	-18.5	392.6	-15.7	748.2	-18.1	103.4	44.151	-15.788	43.681	0.6	1.1	65.7	11.9299	9.6	1.146	1.863	1.51467	50.0077	19.3	8	200	0.0217282	10.0066	10.238	31419	6.461	1.4445	NaN	NaN	0.479167	2.41667	NaN	NaN
68001	49	1	9.91	0.5366	70.2	48	-15.5	468.7	-15.3	1428.6	-9.3	222.9	29.6663	-23.132	32.644	1	1.3	115.4	12.8233	8.2	1.061	1.373	1.495	50.0065	32.69	16	150	0.0677292	10.0088	5.387	45696.7	2.418	2.04364	6.15789	5.45126	0.618056	0.983333	NaN	NaN
68002	49	1	8.23	0.9567	7	16	-15.7	295.2	-8.6	1194.6	-21.4	71.1	11.5193	-12.909	42.582	0.6	1	102.2	13.5948	8.3	1.036	1.597	1.57633	50.0084	140.06	8	200	0.0498299	10.0017	6.732	107929	8.735	3.29734	3.2	3.51989	0.618056	2.41667	NaN	NaN
68003	49	1	6.99	1.1	74.1	19	-6	225.3	-18.1	512.9	-15	180.3	40.601	-19.491	39.368	0.9	1.4	92.2	12.7482	10.8	0.991	1.264	1.558	49	14.07	8	200	0.0233291	10.0092	21.95	18825.1	2.722	1.74142	2.83333	3.50875	0.618056	3.16667	NaN	NaN
72001	49	1	8.18	0.4728	55.7	21.4	-9.7	249.5	-27.4	241.5	-3	182.8	27.8118	-23.956	43.193	0.8	1.5	84.6	6.2352	12.3	0.967	3.424	0.983	35	32.04	1	126.4	0.0315171	NaN	NaN	NaN	NaN	NaN	NaN	NaN	0.545139	0.416667	NaN	NaN
72002	49	1	8.96	1.2	10.7	12.8	-4.1	135.9	-6.9	856.5	-16.5	172.2	43.485	-17.924	36.428	1.2	2.2	82.9	10.1246	11.6	1.043	2.304	1.133	50.003	137.81	8	200	0.0244763	10.005	12.88	71069.4	4.96	2.44411	1.21667	2.85487	0.545139	0.7	NaN	NaN
72003	49	1	11.41	0.565	41.8	18.3	-16.4	320.7	-18.7	439.8	-23.6	207.7	40.7772	-27.344	37.221	1.2	2.3	98.9	7.0023	24	0.654	1.445	0.777667	31	7.69	20	7	0.186953	10.0011	254.87	22828.3	1.375	2.37051	NaN	NaN	0.545139	1.21667	NaN	NaN
72004	49	1	11.11	1.3	21.7	12.8	-14.7	641.1	-7.5	717.9	-12.5	162.1	66.2485	-18.433	43.111	0.9	1.7	180.047	14.3647	8.4	1.06	2.065	1.435	50.0066	138.05	8	200	0.0283531	10.0074	3.714	18829.8	1.916	0.292392	2.01695	2.6484	0.545139	1.78333	NaN	NaN
73001	49	1	7.7	0.954	9.5	17.1	-16.7	420.8	-20	1058.5	8.3	141.7	74.7954	-24.882	41.951	0.7	1.5	91	7.3683	13.2	2.735	1.778	1.50433	50.0094	135.68	7	150	0.0296996	10.0068	22.912	17048.1	1.416	1.79804	3.5	4.63408	0.652778	0.583333	NaN	NaN
73002	49	1	5.92	1.2	51.7	19.5	-18.8	249.1	-17.9	223.5	-17.9	87	46.4057	-24.15	43.233	0.8	2.3	50.4	6.9434	12.4	0.903	4.01	1.00667	29	73.39	8	200	0.0035759	NaN	NaN	NaN	NaN	NaN	2.28333	2.82516	0.652778	1.21667	NaN	NaN
73003	49	1	5.41	1.8	41.8	14	-17.7	286	-18.7	263.2	-14.1	92.9	51.71	-19.073	34.597	0.9	2.2	170.8	6.8687	24.2	1.033	1.625	1.015	35	93.37	8	200	0.00704904	NaN	NaN	NaN	NaN	NaN	NaN	NaN	0.652778	1.5	NaN	NaN
73004	49	1	8.3	0.8008	61.5	16.5	-11.1	332.8	-6.6	662.5	-4.1	162.1	65.0327	-19.257	44.881	0.9	1.9	150.6	10.2752	9	1.1	3.607	1.198	50.0032	136.41	8	200	0.022505	10.0017	5.378	28833.2	2.537	0.828984	NaN	NaN	0.652778	1.85	NaN	NaN
77001	49	0	7.14	0.7699	10.3	19.5	-16.8	443.9	-16.3	926.8	2.6	173.1	32.8604	-24.607	48.991	0.7	1.3	180.019	9.3585	8.2	1.073	1.756	1.55767	46	11.25	8	200	0.0195421	NaN	NaN	NaN	NaN	NaN	NaN	NaN	0.565972	1.3	NaN	NaN
77002	49	0	5.48	1.8	15.4	14.6	-29.1	288.3	-10.4	864.2	21.6	139.4	49.4882	-27.14	36.926	0.6	2	88.5	9.2166	8.1	1.012	2.249	1.37	50.0011	135.91	8	200	0.0280751	NaN	NaN	NaN	NaN	NaN	NaN	NaN	0.565972	2.08333	NaN	NaN
78002	49	0	7.87	0.437	31.7	30	-16	478.9	-22.1	503.9	-15.1	102.3	21.053	-24.567	46.183	0.9	1.7	58	4.7153	14.8	1.095	2.295	1.009	31	39.45	6	150	0.0718091	NaN	NaN	NaN	NaN	NaN	NaN	NaN	0.354167	1.18333	211.111	244.444
78003	49	0	9.97	0.9693	83.8	18.9	-17.8	182.1	-37	185.9	-13	92.5	21.5257	-14.679	23.977	1.3	3	49.9	6.0003	15.5	1.265	1.875	0.996	36	123.12	6	150	0.00943917	40.609	126.605	6605.95	3.52	1.40128	NaN	NaN	0.354167	1.43333	224.444	233.333
78005	49	0	7.03	0.7563	62.9	33.6	-19.6	249.4	-21.1	217.7	-17.8	95.5	40.3592	-14.994	19.175	1	2.8	180.063	2.9222	37.3	1.029	0.832	1	28	112.07	8	200	0.00217692	10.0028	110.042	3664.32	2.099	1.52532	0.3	2.99805	0.354167	2.1	242.222	117.778
78006	49	0	7.76	1.8	30.6	12.8	-15.9	201.7	-7.2	561.2	-19.7	117.8	18.8641	-16.378	27.649	1.3	3	100.9	10.7441	12.2	1	1.462	1.346	50.0068	136.88	8	200	0.0313303	300	1.002	2552.67	1	1.57694	2.13333	3.81033	0.354167	2.73333	284.444	188.889
78007	49	0	10.38	0.3527	19.6	37.8	-15.6	953.1	-25.7	1242.1	-24.5	57.8	90.2913	-23.59	60.465	0.5	0.8	180.08	12.3065	10.2	1.069	1.394	1.36967	50.0045	132.93	1	150	0.0751007	NaN	NaN	NaN	NaN	NaN	NaN	NaN	0.354167	3.26667	260	240
79001	49	1	9.76	0.4797	66.5	18.9	-18.1	272.7	-9.7	235.3	-9.8	72.2	9.05046	-11.414	40.619	0.8	2	89.9	9.0178	13	1.115	1.889	0.946333	32	11.34	1	48.1	0.0727323	10.0012	19.158	84510.5	7.631	1.96871	0.666667	2.19376	0.5	0.416667	108.889	255.556
79002	49	1	9	0.6746	37.7	17.7	-7.4	278.3	-10.2	429.9	-14.7	195.4	34.6377	-12.594	40.141	0.7	1.3	101.6	10.3931	10.7	1.009	1.758	1.12333	50.0067	136.93	1	150	0.0346572	44.398	127.264	15366	1.395	2.57697	4.45	3.99229	0.5	1.03333	157.778	266.667
79003	49	1	12.75	0.3886	66.5	24	-20	475.5	-9.5	362.2	-7	127.7	49.5457	-12.919	44.881	0.6	1	180.063	16.0378	7.8	1.051	1.63	1.41533	50.0039	136.64	3	53.5	0.105906	100.363	195.638	15401.2	1.373	2.04495	0.894737	2.48122	0.5	1.56667	208.889	206.667
79004	49	1	8	1.3	51.1	16	-17.4	277.2	-8.2	529.9	-19.4	81.4	36.8612	-15.951	43.111	0.8	1.5	42.8	9.1712	11.3	1.15	1.72	1.25333	50.0096	140.07	8	200	0.0318908	10.0064	8.945	10517.1	4.333	0.725422	3.5	2.61628	0.5	2.41667	93.3333	135.556
79005	49	1	10.19	0.5029	82.2	17.1	-16.3	416.9	-9.6	956	-21.2	113.1	13.7956	-15.727	48.859	0.6	1.1	131	11.9724	9	1.144	1.316	1.398	50.0049	133.93	1	49.9	0.0919441	10.0005	172.613	20671.5	1.554	2.58105	2.41667	4.54447	0.5	2.95	166.667	180
79006	49	1	11.46	0.7168	28	16.5	-14.4	1042.3	-8.6	1213.3	-15.7	99.3	15.6212	-17.09	44.25	0.6	0.8	180.069	20.7259	5.4	1.111	1.442	1.64833	50.0012	99.85	8	200	0.0538918	10.0009	3.029	39753.2	2.085	2.15697	5.24138	4.55767	0.5	3.65	128.889	206.667
80001	47	0	9.86	0.3641	35.5	57.4	-17.7	590.5	-17.3	819.5	-15.1	138.8	56.9998	-21.322	44.393	0.6	1.6	110.5	7.0472	17.6	1.006	1.842	0.892	29	7.15	1	16.6	0.0350807	10.0087	8.021	33216.1	2.411	3.21256	3.37931	3.819	0.371528	2.61667	148.889	233.333
82001	46	0	12.41	0.8105	51.8	21.4	-27.8	578	-10.3	457.3	-19.9	115.4	46.8096	-22.176	41.494	0.7	2.3	62	7.704	14.2	1.148	1.65	0.915	37	11.02	4	5.6	0.0466753	NaN	NaN	NaN	NaN	NaN	NaN	NaN	0.335417	0.733333	177.778	233.333
82002	46	1	11.37	0.4696	26.9	20.1	-15.7	545.9	-8.2	710.9	-12.4	215.4	36.4882	-24.384	53.365	0.9	1.7	161.6	13.3929	9.3	1.032	1.405	1.36633	50.0007	134.1	1	34.7	0.0746363	63.276	150.664	9495.68	2.219	0.32031	1.88333	2.69013	0.335417	1.03333	186.667	140
82003	46	1	12.77	0.7637	55.7	33	-7.4	277.5	-20.6	374.8	-13.3	353.4	35.7463	-23.478	39.012	1.2	2.4	146.1	10.4448	23	0.587	0.484	1.045	50.0049	139.31	7	17.7	0.0832303	136.395	289.462	12889.6	1.072	1.95084	4.8	3.63427	0.335417	1.61667	144.444	142.222
82005	46	1	15.3	0.5103	35.8	19.5	-18	859.4	-15.4	745.5	-15.4	237.8	67.1124	-18.972	58.044	0.5	0.8	180.094	14.8974	7.8	1.064	1.191	1.23933	50.0076	132.55	11	36.6	0.112495	300	300	11360.7	1.042	3.94673	8.37931	3.71873	0.335417	2.3	193.333	148.889
82006	46	1	12.07	0.7014	43.3	23.2	-7.7	285	-31.7	435.2	-11.9	365	53.2897	-19.765	36.875	1.1	2.1	110.6	8.9371	36.4	0.382	1.05	1.13	50.0019	137.11	2	91.2	0.0497325	88.528	300	14231.3	1.214	1.34179	4.68333	4.45893	0.335417	3.06667	155.556	153.333
82007	46	1	11.57	1.1	30.9	23.8	-17.1	296.4	-8.4	742.8	-20.3	149.3	34.203	-18.992	35.38	1	1.7	130.4	7.7769	9.7	1.021	2.686	1.161	50.0017	140.21	1	59.9	0.064392	13.207	3.632	5765.13	2.036	1.65595	3.61667	3.76355	0.335417	3.53333	126.667	171.111
83002	49	0	8.15	0.7455	34.7	17.6	-15.7	431.1	-19	975.2	-18.2	118.4	27.6602	-24.699	40.029	0.9	1.4	145.9	13.4219	10.2	0.931	1.47	1.76267	50.0078	143.96	8	200	0.0236959	NaN	NaN	NaN	NaN	NaN	NaN	NaN	0.430556	0.783333	NaN	NaN
83003	49	0	7.74	0.88	26.2	24	-13.2	370.7	-17.7	850.3	-11.5	233	36.8494	-24.434	40.7	1.3	2	96.1	9.9236	10.3	1.107	2.045	1.407	50.0056	134.27	7	150	0.0200421	10.0096	9.079	21000.6	2.201	1.38759	NaN	NaN	0.430556	1.35	193.333	200
